# Supplementary material
Source: publisher site journal article supplement (https://www.dovepress.com/article/573503)
Supplement: Supplementary file 1 [file 573503%20Supplementary%20Material.pdf]

**Supplemental Figure 1**

Passing-Bablok plot of measurement of hemoglobin concentration in fresh vs. frozen and thawed samples. The plot was generated using R software.

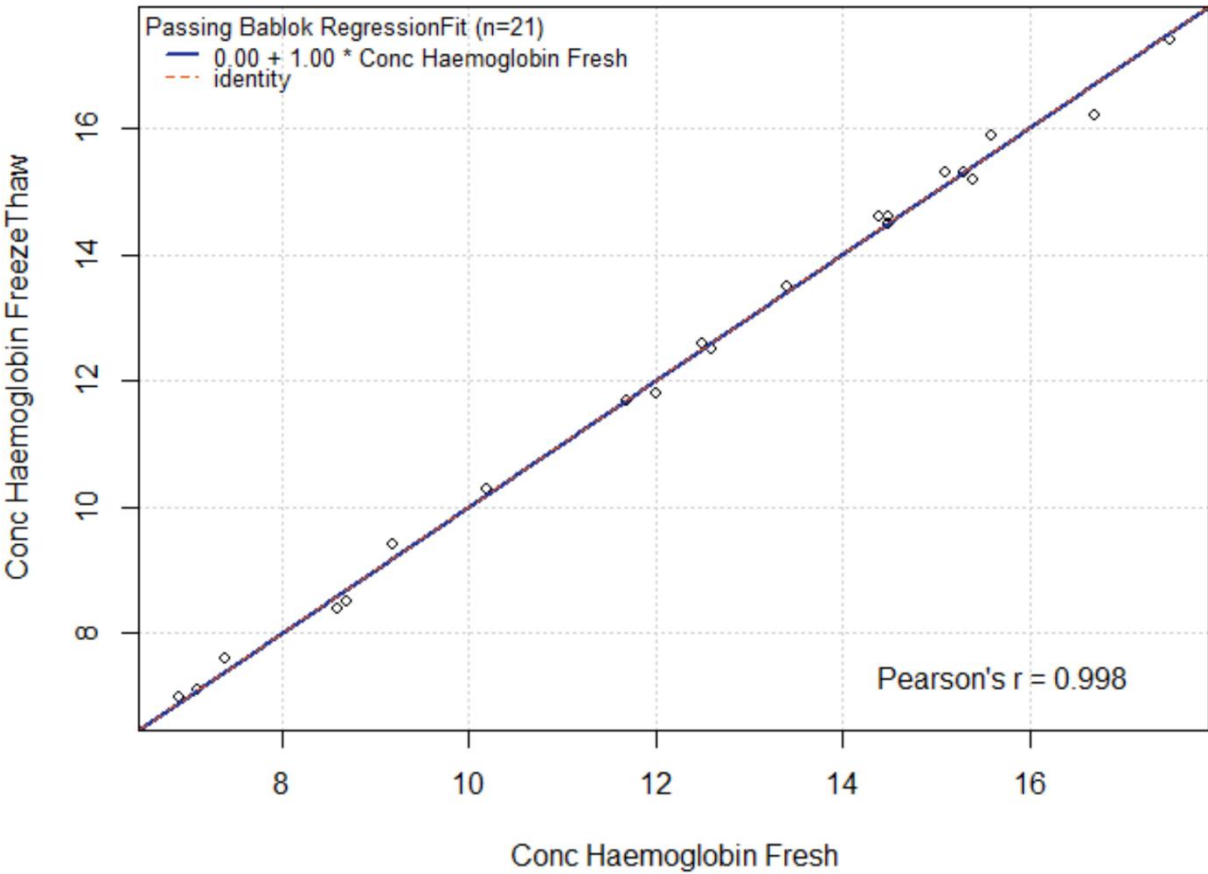

Conc, Concentration

### Supplemental Table 1

Overlap of diagnostic criteria for iron deficiency in the TIDL study.

|                      | TSat < 20%, n | TSat ≥ 20 %, n | Total, n |
|----------------------|---------------|----------------|----------|
| Ferritin < cutoff, n | 40            | 34             | 74       |
| Ferritin ≥ cutoff, n | 167           | 758            | 925      |
| Total, n             | 207           | 792            | 999      |

Ferritin cutoff: 100 µg/L if CRP ≥ 5 mg/L. 30 µg/L if CRP < 5 mg/L.

TSat, Transferrin saturation

### Supplemental Table 2

Prevalence of anemia and elevated hemoglobin, by groups of COPD and emphysema

|                                              | Total<br>n = 1002 | COPD –<br>Emphysema –<br>n = 671 | COPD –<br>Emphysema +<br>n = 98 | COPD +<br>Emphysema –<br>n = 132 | COPD +<br>Emphysema +<br>n = 100 |
|----------------------------------------------|-------------------|----------------------------------|---------------------------------|----------------------------------|----------------------------------|
| Anemia <sup>a</sup> , n (%)                  | 81 (8)            | 54 (8)                           | 8 (8)                           | 9 (7)                            | 10 (10)                          |
| Hemoglobin > ref. range <sup>b</sup> , n (%) | 40 (4)            | 27 (4)                           | 4 (4)                           | 7 (5)                            | 2 (2)                            |

<sup>a</sup> WHO defined anemia: Females: Hemoglobin < 12 g/dL. Males: Hemoglobin < 13 g/dL

<sup>b</sup> Reference range of hemoglobin: Females: 11.7–15.3 g/dL, Males: 13.4–17.0 g/dL
